# Supplementary material
Source: MDPI journal article supplement (https://www.mdpi.com/2076-3417/12/11/5639)
Supplement: s1 [file s1]

## Ablaufplan

45. Tiliachnita (juv.) max. 62

[illegible]

| Prüfungsinhalt                                                                                                                                                                                                                                                                                                                                                                                                                                                                                                                        |  | Prüfung und Bewertung |  | Prüfungstermin |  | Prüfungsort |  | Prüfungsdauer |  | Prüfungswert |  |
|---------------------------------------------------------------------------------------------------------------------------------------------------------------------------------------------------------------------------------------------------------------------------------------------------------------------------------------------------------------------------------------------------------------------------------------------------------------------------------------------------------------------------------------|--|-----------------------|--|----------------|--|-------------|--|---------------|--|--------------|--|
| Prüfungsinhalt                                                                                                                                                                                                                                                                                                                                                                                                                                                                                                                        |  | Prüfung und Bewertung |  | Prüfungstermin |  | Prüfungsort |  | Prüfungsdauer |  | Prüfungswert |  |
| <b>Prüfungsinhalt</b><br>Die Prüfung besteht aus einer schriftlichen Prüfung und einer mündlichen Prüfung. Die schriftliche Prüfung umfasst die Themenbereiche: Grundlagen der Betriebswirtschaftslehre, Marketing, Personalwirtschaft, Beschaffungswirtschaft, Produktion und Logistik, Finanzierung und Rechnungswesen. Die mündliche Prüfung umfasst die Themenbereiche: Grundlagen der Betriebswirtschaftslehre, Marketing, Personalwirtschaft, Beschaffungswirtschaft, Produktion und Logistik, Finanzierung und Rechnungswesen. |  |                       |  |                |  |             |  |               |  |              |  |
| <b>Prüfung und Bewertung</b><br>Die Prüfung wird in zwei Teilen durchgeführt. Der erste Teil ist eine schriftliche Prüfung, die den Themenbereich Grundlagen der Betriebswirtschaftslehre umfasst. Der zweite Teil ist eine mündliche Prüfung, die den Themenbereich Marketing umfasst. Die Bewertung erfolgt nach folgender Skala: 1 = sehr gut, 2 = gut, 3 = befriedigend, 4 = ausreichend, 5 = nicht ausreichend.                                                                                                                  |  |                       |  |                |  |             |  |               |  |              |  |
| <b>Prüfungstermin</b><br>Die Prüfung findet am 15. März 2024 statt.                                                                                                                                                                                                                                                                                                                                                                                                                                                                   |  |                       |  |                |  |             |  |               |  |              |  |
| <b>Prüfungsort</b><br>Die Prüfung findet im Saal 1 des Gebäudes 1 statt.                                                                                                                                                                                                                                                                                                                                                                                                                                                              |  |                       |  |                |  |             |  |               |  |              |  |
| <b>Prüfungsdauer</b><br>Die Prüfung dauert 120 Minuten.                                                                                                                                                                                                                                                                                                                                                                                                                                                                               |  |                       |  |                |  |             |  |               |  |              |  |
| <b>Prüfungswert</b><br>Die Prüfung ist für die Zulassung zum Studium erforderlich.                                                                                                                                                                                                                                                                                                                                                                                                                                                    |  |                       |  |                |  |             |  |               |  |              |  |
| <b>Prüfungsinhalt</b><br>Die Prüfung besteht aus einer schriftlichen Prüfung und einer mündlichen Prüfung. Die schriftliche Prüfung umfasst die Themenbereiche: Grundlagen der Betriebswirtschaftslehre, Marketing, Personalwirtschaft, Beschaffungswirtschaft, Produktion und Logistik, Finanzierung und Rechnungswesen. Die mündliche Prüfung umfasst die Themenbereiche: Grundlagen der Betriebswirtschaftslehre, Marketing, Personalwirtschaft, Beschaffungswirtschaft, Produktion und Logistik, Finanzierung und Rechnungswesen. |  |                       |  |                |  |             |  |               |  |              |  |
| <b>Prüfung und Bewertung</b><br>Die Prüfung wird in zwei Teilen durchgeführt. Der erste Teil ist eine schriftliche Prüfung, die den Themenbereich Grundlagen der Betriebswirtschaftslehre umfasst. Der zweite Teil ist eine mündliche Prüfung, die den Themenbereich Marketing umfasst. Die Bewertung erfolgt nach folgender Skala: 1 = sehr gut, 2 = gut, 3 = befriedigend, 4 = ausreichend, 5 = nicht ausreichend.                                                                                                                  |  |                       |  |                |  |             |  |               |  |              |  |
| <b>Prüfungstermin</b><br>Die Prüfung findet am 15. März 2024 statt.                                                                                                                                                                                                                                                                                                                                                                                                                                                                   |  |                       |  |                |  |             |  |               |  |              |  |
| <b>Prüfungsort</b><br>Die Prüfung findet im Saal 1 des Gebäudes 1 statt.                                                                                                                                                                                                                                                                                                                                                                                                                                                              |  |                       |  |                |  |             |  |               |  |              |  |
| <b>Prüfungsdauer</b><br>Die Prüfung dauert 120 Minuten.                                                                                                                                                                                                                                                                                                                                                                                                                                                                               |  |                       |  |                |  |             |  |               |  |              |  |
| <b>Prüfungswert</b><br>Die Prüfung ist für die Zulassung zum Studium erforderlich.                                                                                                                                                                                                                                                                                                                                                                                                                                                    |  |                       |  |                |  |             |  |               |  |              |  |

Downloaded from <https://www.cambridge.org/core>. University of Cambridge, on 02 Jun 2020 at 10:00:00, subject to the Cambridge Core terms of use, available at <https://www.cambridge.org/core/terms>. <https://doi.org/10.1017/S0022292520000500>

[illegible][illegible][illegible][illegible][illegible]

Downloaded from <http://ajphaphysocpharm.sagepub.com/> at 11:01 11 November 2014

| Merkmal = Submerkmal |  |
|----------------------|--|----------------------|--|----------------------|--|----------------------|--|
| Merkmal = Submerkmal |  |
| 1. Submerkmal        |  |                      |  |                      |  |                      |  |
| 2. Submerkmal        |  |                      |  |                      |  |                      |  |
| 3. Submerkmal        |  |                      |  |                      |  |                      |  |
| 4. Submerkmal        |  |                      |  |                      |  |                      |  |
| 5. Submerkmal        |  |                      |  |                      |  |                      |  |
| 6. Submerkmal        |  |                      |  |                      |  |                      |  |
| 7. Submerkmal        |  |                      |  |                      |  |                      |  |
| 8. Submerkmal        |  |                      |  |                      |  |                      |  |
| 9. Submerkmal        |  |                      |  |                      |  |                      |  |
| 10. Submerkmal       |  |                      |  |                      |  |                      |  |
| 11. Submerkmal       |  |                      |  |                      |  |                      |  |
| 12. Submerkmal       |  |                      |  |                      |  |                      |  |
| 13. Submerkmal       |  |                      |  |                      |  |                      |  |
| 14. Submerkmal       |  |                      |  |                      |  |                      |  |
| 15. Submerkmal       |  |                      |  |                      |  |                      |  |
| 16. Submerkmal       |  |                      |  |                      |  |                      |  |
| 17. Submerkmal       |  |                      |  |                      |  |                      |  |
| 18. Submerkmal       |  |                      |  |                      |  |                      |  |
| 19. Submerkmal       |  |                      |  |                      |  |                      |  |
| 20. Submerkmal       |  |                      |  |                      |  |                      |  |
| 21. Submerkmal       |  |                      |  |                      |  |                      |  |
| 22. Submerkmal       |  |                      |  |                      |  |                      |  |
| 23. Submerkmal       |  |                      |  |                      |  |                      |  |
| 24. Submerkmal       |  |                      |  |                      |  |                      |  |
| 25. Submerkmal       |  |                      |  |                      |  |                      |  |
| 26. Submerkmal       |  |                      |  |                      |  |                      |  |
| 27. Submerkmal       |  |                      |  |                      |  |                      |  |
| 28. Submerkmal       |  |                      |  |                      |  |                      |  |
| 29. Submerkmal       |  |                      |  |                      |  |                      |  |
| 30. Submerkmal       |  |                      |  |                      |  |                      |  |
| 31. Submerkmal       |  |                      |  |                      |  |                      |  |
| 32. Submerkmal       |  |                      |  |                      |  |                      |  |
| 33. Submerkmal       |  |                      |  |                      |  |                      |  |
| 34. Submerkmal       |  |                      |  |                      |  |                      |  |
| 35. Submerkmal       |  |                      |  |                      |  |                      |  |
| 36. Submerkmal       |  |                      |  |                      |  |                      |  |
| 37. Submerkmal       |  |                      |  |                      |  |                      |  |
| 38. Submerkmal       |  |                      |  |                      |  |                      |  |
| 39. Submerkmal       |  |                      |  |                      |  |                      |  |
| 40. Submerkmal       |  |                      |  |                      |  |                      |  |
| 41. Submerkmal       |  |                      |  |                      |  |                      |  |
| 42. Submerkmal       |  |                      |  |                      |  |                      |  |
| 43. Submerkmal       |  |                      |  |                      |  |                      |  |
| 44. Submerkmal       |  |                      |  |                      |  |                      |  |
| 45. Submerkmal       |  |                      |  |                      |  |                      |  |
| 46. Submerkmal       |  |                      |  |                      |  |                      |  |
| 47. Submerkmal       |  |                      |  |                      |  |                      |  |
| 48. Submerkmal       |  |                      |  |                      |  |                      |  |
| 49. Submerkmal       |  |                      |  |                      |  |                      |  |
| 50. Submerkmal       |  |                      |  |                      |  |                      |  |
| 51. Submerkmal       |  |                      |  |                      |  |                      |  |
| 52. Submerkmal       |  |                      |  |                      |  |                      |  |
| 53. Submerkmal       |  |                      |  |                      |  |                      |  |
| 54. Submerkmal       |  |                      |  |                      |  |                      |  |
| 55. Submerkmal       |  |                      |  |                      |  |                      |  |
| 56. Submerkmal       |  |                      |  |                      |  |                      |  |
| 57. Submerkmal       |  |                      |  |                      |  |                      |  |
| 58. Submerkmal       |  |                      |  |                      |  |                      |  |
| 59. Submerkmal       |  |                      |  |                      |  |                      |  |
| 60. Submerkmal       |  |                      |  |                      |  |                      |  |
| 61. Submerkmal       |  |                      |  |                      |  |                      |  |
| 62. Submerkmal       |  |                      |  |                      |  |                      |  |
| 63. Submerkmal       |  |                      |  |                      |  |                      |  |
| 64. Submerkmal       |  |                      |  |                      |  |                      |  |
| 65. Submerkmal       |  |                      |  |                      |  |                      |  |
| 66. Submerkmal       |  |                      |  |                      |  |                      |  |
| 67. Submerkmal       |  |                      |  |                      |  |                      |  |
| 68. Submerkmal       |  |                      |  |                      |  |                      |  |
| 69. Submerkmal       |  |                      |  |                      |  |                      |  |
| 70. Submerkmal       |  |                      |  |                      |  |                      |  |
| 71. Submerkmal       |  |                      |  |                      |  |                      |  |
| 72. Submerkmal       |  |                      |  |                      |  |                      |  |
| 73. Submerkmal       |  |                      |  |                      |  |                      |  |
| 74. Submerkmal       |  |                      |  |                      |  |                      |  |
| 75. Submerkmal       |  |                      |  |                      |  |                      |  |
| 76. Submerkmal       |  |                      |  |                      |  |                      |  |
| 77. Submerkmal       |  |                      |  |                      |  |                      |  |
| 78. Submerkmal       |  |                      |  |                      |  |                      |  |
| 79. Submerkmal       |  |                      |  |                      |  |                      |  |
| 80. Submerkmal       |  |                      |  |                      |  |                      |  |
| 81. Submerkmal       |  |                      |  |                      |  |                      |  |
| 82. Submerkmal       |  |                      |  |                      |  |                      |  |
| 83. Submerkmal       |  |                      |  |                      |  |                      |  |
| 84. Submerkmal       |  |                      |  |                      |  |                      |  |
| 85. Submerkmal       |  |                      |  |                      |  |                      |  |
| 86. Submerkmal       |  |                      |  |                      |  |                      |  |
| 87. Submerkmal       |  |                      |  |                      |  |                      |  |
| 88. Submerkmal       |  |                      |  |                      |  |                      |  |
| 89. Submerkmal       |  |                      |  |                      |  |                      |  |
| 90. Submerkmal       |  |                      |  |                      |  |                      |  |
| 91. Submerkmal       |  |                      |  |                      |  |                      |  |
| 92. Submerkmal       |  |                      |  |                      |  |                      |  |
| 93. Submerkmal       |  |                      |  |                      |  |                      |  |
| 94. Submerkmal       |  |                      |  |                      |  |                      |  |
| 95. Submerkmal       |  |                      |  |                      |  |                      |  |
| 96. Submerkmal       |  |                      |  |                      |  |                      |  |
| 97. Submerkmal       |  |                      |  |                      |  |                      |  |
| 98. Submerkmal       |  |                      |  |                      |  |                      |  |
| 99. Submerkmal       |  |                      |  |                      |  |                      |  |
| 100. Submerkmal      |  |                      |  |                      |  |                      |  |

[illegible][illegible][illegible]

Central Bank of India

[illegible][illegible][illegible][illegible]

|  |  |
|--|--|
|  |  |
|  |  |
|  |  |
|  |  |
|  |  |
|  |  |

| Verstärkungsrechnung A100            |  |
|--------------------------------------|--|
| Mensch + Roboter                     |  |
| → <b>Verstärkung</b>                 |  |
| 1. Schichtaufbau                     |  |
| Roboterische Schicht                 |  |
|                                      |  |
| → <b>Roboterparameter für Mensch</b> |  |
| Mensch                               |  |
| Roboter                              |  |
| → <b>Kollisionsparameter</b>         |  |
|                                      |  |
| Anzahl und Position                  |  |
|                                      |  |
| Roboter oder gesteuert               |  |
| Anzahl                               |  |
| Position                             |  |

[illegible]

|                                                                                              |
|----------------------------------------------------------------------------------------------|
| <ul style="list-style-type: none"> <li>• Technische InformationsEngineering</li> </ul>       |
| <ul style="list-style-type: none"> <li>• Schulungsmittel</li> </ul>                          |
| <ul style="list-style-type: none"> <li>• Schulung und Informationsmanagement</li> </ul>      |
| <ul style="list-style-type: none"> <li>• Mensch + Maschine</li> </ul>                        |
| <ul style="list-style-type: none"> <li>• Fachwissen</li> </ul>                               |
| <ul style="list-style-type: none"> <li>• Informationsstruktur</li> </ul>                     |
| <ul style="list-style-type: none"> <li>• Informationsbedarf</li> </ul>                       |
| <ul style="list-style-type: none"> <li>• Informationsparameter für diesen Prozess</li> </ul> |
| <ul style="list-style-type: none"> <li>• Modell</li> </ul>                                   |
| <ul style="list-style-type: none"> <li>• Daten</li> </ul>                                    |
| <ul style="list-style-type: none"> <li>• Informationsparameter</li> </ul>                    |
| <ul style="list-style-type: none"> <li>• Anwendungs-Informationen</li> </ul>                 |
| <ul style="list-style-type: none"> <li>• Daten und Modelle</li> </ul>                        |
| <ul style="list-style-type: none"> <li>• Modelliert oder generiert</li> </ul>                |

|                                   |
|-----------------------------------|
| • Zweifelhafte Schlussfolgerungen |
| Schulungstyp                      |
| Schulungsinhalte und -methoden    |
| Schulungsergebnisse               |
| Schulungseffektivität             |

  

|                                           |
|-------------------------------------------|
| <b>Merkmale • Merkmale</b>                |
| • <b>Fachlichkeit</b>                     |
| 1. <b>Schulungsinhalte</b>                |
| Inhaltlicher Aspekt                       |
| Methodischer Aspekt                       |
| 2. <b>Schulungsparameter für den Kurs</b> |
| Mittel                                    |
| Mittel                                    |
| 3. <b>Schulungsparameter</b>              |
| Spezifische Schulungsparameter            |
| Art und Weise                             |
| Effektivität oder -grad                   |
| Schulung                                  |

[illegible][illegible]

Die beiden ersten Aufgaben sind als Musteraufgaben zu verstehen. Die Aufgaben 3 bis 10 sind die eigentlichen Aufgaben der Klausur. Die Aufgaben 11 bis 13 sind als Bonusaufgaben zu verstehen.

[illegible]
