# Supplementary material
Source: MDPI journal article supplement (https://www.mdpi.com/2076-3417/12/11/5639)
Supplement: s1 [file s1]

Ablaufplan

1. Termin: 10.01.2023  
2. Termin: 17.01.2023

Einzelklausuren

| Prüfung | Prüfungstermin | Prüfungsort | Prüfungsfach | Prüfungsinhalt | Prüfungsergebnis | Prüfungstermin | Prüfungsort | Prüfungsfach | Prüfungsinhalt | Prüfungsergebnis |
|---------|----------------|-------------|--------------|----------------|------------------|----------------|-------------|--------------|----------------|------------------|
| 1       | 10.01.2023     |             |              |                |                  | 2              | 17.01.2023  |              |                |                  |
| 3       | 24.01.2023     |             |              |                |                  | 4              | 31.01.2023  |              |                |                  |
| 5       | 07.02.2023     |             |              |                |                  | 6              | 14.02.2023  |              |                |                  |
| 7       | 21.02.2023     |             |              |                |                  | 8              | 28.02.2023  |              |                |                  |
| 9       | 06.03.2023     |             |              |                |                  | 10             | 13.03.2023  |              |                |                  |
| 11      | 20.03.2023     |             |              |                |                  | 12             | 27.03.2023  |              |                |                  |
| 13      | 03.04.2023     |             |              |                |                  | 14             | 10.04.2023  |              |                |                  |
| 15      | 17.04.2023     |             |              |                |                  | 16             | 24.04.2023  |              |                |                  |
| 17      | 01.05.2023     |             |              |                |                  | 18             | 08.05.2023  |              |                |                  |
| 19      | 15.05.2023     |             |              |                |                  | 20             | 22.05.2023  |              |                |                  |
| 21      | 29.05.2023     |             |              |                |                  | 22             | 05.06.2023  |              |                |                  |
| 23      | 12.06.2023     |             |              |                |                  | 24             | 19.06.2023  |              |                |                  |
| 25      | 26.06.2023     |             |              |                |                  | 26             | 03.07.2023  |              |                |                  |
| 27      | 10.07.2023     |             |              |                |                  | 28             | 17.07.2023  |              |                |                  |
| 29      | 24.07.2023     |             |              |                |                  | 30             | 31.07.2023  |              |                |                  |
| 31      | 07.08.2023     |             |              |                |                  | 32             | 14.08.2023  |              |                |                  |
| 33      | 21.08.2023     |             |              |                |                  | 34             | 28.08.2023  |              |                |                  |
| 35      | 04.09.2023     |             |              |                |                  | 36             | 11.09.2023  |              |                |                  |
| 37      | 18.09.2023     |             |              |                |                  | 38             | 25.09.2023  |              |                |                  |
| 39      | 02.10.2023     |             |              |                |                  | 40             | 09.10.2023  |              |                |                  |
| 41      | 16.10.2023     |             |              |                |                  | 42             | 23.10.2023  |              |                |                  |
| 43      | 30.10.2023     |             |              |                |                  | 44             | 06.11.2023  |              |                |                  |
| 45      | 13.11.2023     |             |              |                |                  | 46             | 20.11.2023  |              |                |                  |
| 47      | 27.11.2023     |             |              |                |                  | 48             | 04.12.2023  |              |                |                  |
| 49      | 10.12.2023     |             |              |                |                  | 50             | 18.12.2023  |              |                |                  |
| 51      | 24.12.2023     |             |              |                |                  | 52             | 01.01.2024  |              |                |                  |
| 53      | 07.01.2024     |             |              |                |                  | 54             | 14.01.2024  |              |                |                  |
| 55      | 21.01.2024     |             |              |                |                  | 56             | 28.01.2024  |              |                |                  |
| 57      | 04.02.2024     |             |              |                |                  | 58             | 11.02.2024  |              |                |                  |
| 59      | 18.02.2024     |             |              |                |                  | 60             | 25.02.2024  |              |                |                  |
| 61      | 03.03.2024     |             |              |                |                  | 62             | 10.03.2024  |              |                |                  |
| 63      | 17.03.2024     |             |              |                |                  | 64             | 24.03.2024  |              |                |                  |
| 65      | 31.03.2024     |             |              |                |                  | 66             | 07.04.2024  |              |                |                  |
| 67      | 14.04.2024     |             |              |                |                  | 68             | 21.04.2024  |              |                |                  |
| 69      | 28.04.2024     |             |              |                |                  | 70             | 05.05.2024  |              |                |                  |
| 71      | 12.05.2024     |             |              |                |                  | 72             | 19.05.2024  |              |                |                  |
| 73      | 26.05.2024     |             |              |                |                  | 74             | 09.06.2024  |              |                |                  |
| 75      | 09.06.2024     |             |              |                |                  | 76             | 23.06.2024  |              |                |                  |
| 77      | 23.06.2024     |             |              |                |                  | 78             | 07.07.2024  |              |                |                  |
| 79      | 07.07.2024     |             |              |                |                  | 80             | 21.07.2024  |              |                |                  |
| 81      | 14.07.2024     |             |              |                |                  | 82             | 28.07.2024  |              |                |                  |
| 83      | 21.07.2024     |             |              |                |                  | 84             | 04.08.2024  |              |                |                  |
| 85      | 28.07.2024     |             |              |                |                  | 86             | 11.08.2024  |              |                |                  |
| 87      | 04.08.2024     |             |              |                |                  | 88             | 18.08.2024  |              |                |                  |
| 89      | 11.08.2024     |             |              |                |                  | 90             | 25.08.2024  |              |                |                  |
| 91      | 18.08.2024     |             |              |                |                  | 92             | 01.09.2024  |              |                |                  |
| 93      | 25.08.2024     |             |              |                |                  | 94             | 08.09.2024  |              |                |                  |
| 95      | 01.09.2024     |             |              |                |                  | 96             | 15.09.2024  |              |                |                  |
| 97      | 08.09.2024     |             |              |                |                  | 98             | 22.09.2024  |              |                |                  |
| 99      | 15.09.2024     |             |              |                |                  | 100            | 29.09.2024  |              |                |                  |
| 101     | 22.09.2024     |             |              |                |                  | 102            | 06.10.2024  |              |                |                  |
| 103     | 29.09.2024     |             |              |                |                  | 104            | 13.10.2024  |              |                |                  |
| 105     | 06.10.2024     |             |              |                |                  | 106            | 20.10.2024  |              |                |                  |
| 107     | 13.10.2024     |             |              |                |                  | 108            | 27.10.2024  |              |                |                  |
| 109     | 20.10.2024     |             |              |                |                  | 110            | 27.10.2024  |              |                |                  |
| 111     | 27.10.2024     |             |              |                |                  | 112            | 03.11.2024  |              |                |                  |
| 113     | 03.11.2024     |             |              |                |                  | 114            | 10.11.2024  |              |                |                  |
| 115     | 10.11.2024     |             |              |                |                  | 116            | 17.11.2024  |              |                |                  |
| 117     | 17.11.2024     |             |              |                |                  | 118            | 24.11.2024  |              |                |                  |
| 119     | 24.11.2024     |             |              |                |                  | 120            | 01.12.2024  |              |                |                  |
| 121     | 01.12.2024     |             |              |                |                  | 122            | 08.12.2024  |              |                |                  |
| 123     | 08.12.2024     |             |              |                |                  | 124            | 15.12.2024  |              |                |                  |
| 125     | 15.12.2024     |             |              |                |                  | 126            | 22.12.2024  |              |                |                  |
| 127     | 22.12.2024     |             |              |                |                  | 128            | 29.12.2024  |              |                |                  |
| 129     | 29.12.2024     |             |              |                |                  | 130            | 05.01.2025  |              |                |                  |
| 131     | 05.01.2025     |             |              |                |                  | 132            | 12.01.2025  |              |                |                  |
| 133     | 12.01.2025     |             |              |                |                  | 134            | 19.01.2025  |              |                |                  |
| 135     | 19.01.2025     |             |              |                |                  | 136            | 26.01.2025  |              |                |                  |
| 137     | 26.01.2025     |             |              |                |                  | 138            | 02.02.2025  |              |                |                  |
| 139     | 02.02.2025     |             |              |                |                  | 140            | 09.02.2025  |              |                |                  |
| 141     | 09.02.2025     |             |              |                |                  | 142            | 16.02.2025  |              |                |                  |
| 143     | 16.02.2025     |             |              |                |                  | 144            | 23.02.2025  |              |                |                  |
| 145     | 23.02.2025     |             |              |                |                  | 146            | 01.03.2025  |              |                |                  |
| 147     | 01.03.2025     |             |              |                |                  | 148            | 08.03.2025  |              |                |                  |
| 149     | 08.03.2025     |             |              |                |                  | 150            | 15.03.2025  |              |                |                  |
| 151     | 15.03.2025     |             |              |                |                  | 152            | 22.03.2025  |              |                |                  |
| 153     | 22.03.2025     |             |              |                |                  | 154            | 29.03.2025  |              |                |                  |
| 155     | 29.03.2025     |             |              |                |                  | 156            | 05.04.2025  |              |                |                  |
| 157     | 05.04.2025     |             |              |                |                  | 158            | 12.04.2025  |              |                |                  |
| 159     | 12.04.2025     |             |              |                |                  | 160            | 19.04.2025  |              |                |                  |
| 161     | 19.04.2025     |             |              |                |                  | 162            | 26.04.2025  |              |                |                  |
| 163     | 26.04.2025     |             |              |                |                  | 164            | 03.05.2025  |              |                |                  |
| 165     | 03.05.2025     |             |              |                |                  | 166            | 10.05.2025  |              |                |                  |
| 167     | 10.05.2025     |             |              |                |                  | 168            | 17.05.2025  |              |                |                  |
| 169     | 17.05.2025     |             |              |                |                  | 170            | 24.05.2025  |              |                |                  |
| 171     | 24.05.2025     |             |              |                |                  | 172            | 31.05.2025  |              |                |                  |
| 173     | 31.05.2025     |             |              |                |                  | 174            | 07.06.2025  |              |                |                  |
| 175     | 07.06.2025     |             |              |                |                  | 176            | 14.06.2025  |              |                |                  |
| 177     | 14.06.2025     |             |              |                |                  | 178            | 21.06.2025  |              |                |                  |
| 179     | 21.06.2025     |             |              |                |                  | 180            | 28.06.2025  |              |                |                  |
| 181     | 28.06.2025     |             |              |                |                  | 182            | 05.07.2025  |              |                |                  |
| 183     | 05.07.2025     |             |              |                |                  | 184            | 12.07.2025  |              |                |                  |
| 185     | 12.07.2025     |             |              |                |                  | 186            | 19.07.2025  |              |                |                  |
| 187     | 19.07.2025     |             |              |                |                  | 188            | 26.07.2025  |              |                |                  |
| 189     | 26.07.2025     |             |              |                |                  | 190            | 02.08.2025  |              |                |                  |
| 191     | 02.08.2025     |             |              |                |                  | 192            | 09.08.2025  |              |                |                  |
| 193     | 09.08.2025     |             |              |                |                  | 194            | 16.08.2025  |              |                |                  |
| 195     | 16.08.2025     |             |              |                |                  | 196            | 23.08.2025  |              |                |                  |
| 197     | 23.08.2025     |             |              |                |                  | 198            | 30.08.2025  |              |                |                  |
| 199     | 30.08.2025     |             |              |                |                  | 200            | 06.09.2025  |              |                |                  |
| 201     | 06.09.2025     |             |              |                |                  | 202            | 13.09.2025  |              |                |                  |
| 203     | 13.09.2025     |             |              |                |                  | 204            | 20.09.2025  |              |                |                  |
| 205     | 20.09.2025     |             |              |                |                  | 206            | 27.09.2025  |              |                |                  |
| 207     | 27.09.2025     |             |              |                |                  | 208            | 04.10.2025  |              |                |                  |
| 209     | 04.10.2025     |             |              |                |                  | 210            | 11.10.2025  |              |                |                  |
| 211     | 11.10.2025     |             |              |                |                  | 212            | 18.10.2025  |              |                |                  |
| 213     | 18.10.2025     |             |              |                |                  | 214            | 25.10.2025  |              |                |                  |
| 215     | 25.10.2025     |             |              |                |                  | 216            | 01.11.2025  |              |                |                  |
| 217     | 01.11.2025     |             |              |                |                  | 218            | 08.11.2025  |              |                |                  |
| 219     | 08.11.2025     |             |              |                |                  | 220            | 15.11.2025  |              |                |                  |
| 221     | 15.11.2025     |             |              |                |                  | 222            | 22.11.2025  |              |                |                  |
| 223     | 22.11.2025     |             |              |                |                  | 224            | 29.11.2025  |              |                |                  |
| 225     | 29.11.2025     |             |              |                |                  | 226            | 06.12.2025  |              |                |                  |
| 227     | 06.12.2025     |             |              |                |                  | 228            | 13.12.2025  |              |                |                  |
| 229     | 13.12.2025     |             |              |                |                  | 230            | 20.12.2025  |              |                |                  |
| 231     | 20.12.2025     |             |              |                |                  | 232            | 27.12.2025  |              |                |                  |
| 233     | 27.12.2025     |             |              |                |                  | 234            | 03.01.2026  |              |                |                  |
| 235     | 03.01.2026     |             |              |                |                  | 236            | 10.01.2026  |              |                |                  |
| 237     | 10.01.2026     |             |              |                |                  | 238            | 17.01.2026  |              |                |                  |
| 239     | 17.01.2026     |             |              |                |                  | 240            | 24.01.2026  |              |                |                  |
| 241     | 24.01.2026     |             |              |                |                  | 242            | 31.01.2026  |              |                |                  |
| 243     | 31.01.2026     |             |              |                |                  | 244            | 07.02.2026  |              |                |                  |
| 245     | 07.02.2026     |             |              |                |                  | 246            | 14.02.2026  |              |                |                  |
| 247     | 14.02.2026     |             |              |                |                  | 248            | 21.02.2026  |              |                |                  |
| 249     | 21.02.2026     |             |              |                |                  | 250            | 28.02.2026  |              |                |                  |
| 251     | 28.02.2026     |             |              |                |                  | 252            | 06.03.2026  |              |                |                  |
| 253     | 06.03.2026     |             |              |                |                  | 254            | 13.03.2026  |              |                |                  |
| 255     | 13.03.2026     |             |              |                |                  | 256            | 20.03.2026  |              |                |                  |
| 257     | 20.03.2026     |             |              |                |                  | 258            | 27.03.2026  |              |                |                  |
| 259     | 27.03.2026     |             |              |                |                  | 260            | 03.04.2026  |              |                |                  |
| 261     | 03.04.2026     |             |              |                |                  | 262            | 10.04.2026  |              |                |                  |
| 263     | 10.04.2026     |             |              |                |                  | 264            | 17.04.2026  |              |                |                  |
| 265     | 17.04.2026     |             |              |                |                  | 266            | 24.04.2026  |              |                |                  |
| 267     | 24.04.2026     |             |              |                |                  | 268            | 01.05.2026  |              |                |                  |
| 269     | 01.05.2026     |             |              |                |                  | 270            | 08.05.2026  |              |                |                  |
| 271     | 08.05.2026     |             |              |                |                  | 272            | 15.05.2026  |              |                |                  |
| 273     | 15.05.2026     |             |              |                |                  | 274            | 22.05.2026  |              |                |                  |
| 275     | 22.05.2026     |             |              |                |                  | 276            | 29.05.2026  |              |                |                  |
| 277     | 29.05.2026     |             |              |                |                  | 278            | 05.06.2026  |              |                |                  |
| 279     | 05.06.2026     |             |              |                |                  | 280            | 12.06.2026  |              |                |                  |
| 281     | 12.06.2026     |             |              |                |                  | 282            | 19.06.2026  |              |                |                  |
| 283     | 19.06.2026     |             |              |                |                  | 284            | 26.06.2026  |              |                |                  |
| 285     | 26.06.2026     |             |              |                |                  | 286            | 03.07.2026  |              |                |                  |
| 287     | 03.07.2026     |             |              |                |                  | 288            | 10.07.2026  |              |                |                  |
| 289     | 10.07.2026     |             |              |                |                  | 290            | 17.07.2026  |              |                |                  |
| 291     | 17.07.2026     |             |              |                |                  | 292            | 24.07.2026  |              |                |                  |
| 293     | 24.07.2026     |             |              |                |                  | 294            | 31.07.2026  |              |                |                  |
| 295     | 31.07.2026     |             |              |                |                  | 296            | 07.08.2026  |              |                |                  |
| 297     | 07.08.2026     |             |              |                |                  | 298            | 14.08.2026  |              |                |                  |
| 299     | 14.08.2026     |             |              |                |                  | 300            | 21.08.2026  |              |                |                  |
| 301     | 21.08.2026     |             |              |                |                  | 302            | 28.08.2026  |              |                |                  |
| 303     | 28.08.2026     |             |              |                |                  | 304            | 04.09.2026  |              |                |                  |
| 305     | 04.09.2026     |             |              |                |                  | 306            | 11.09.2026  |              |                |                  |
| 307     | 11.09.2026     |             |              |                |                  | 308            | 18.09.2026  |              |                |                  |
| 309     | 18.09.2026     |             |              |                |                  | 310            | 25.09.2026  |              |                |                  |
| 311     | 25.09.2026     |             |              |                |                  | 312            | 02.10.2026  |              |                |                  |
| 313     | 02.10.2026     |             |              |                |                  | 314            |             |              |                |                  |
