# Supplementary material
Source: MDPI journal article supplement (https://www.mdpi.com/2076-3417/12/11/5639)
Supplement: s1 [file s1]

[illegible][illegible][illegible][illegible][illegible]

Declaration of interest: None.

Downloaded from ascelibrary.org by University of California, San Diego on 06/01/15. Copyright ASCE, For All Rights Reserved, No part of this document may be reproduced without written permission from ASCE.

Copyright © 2010 Wolters Kluwer Health | Lippincott Williams & Wilkins

William H. Ransaw

| Metapher + Reduktion        |  | Grundgesamtheit: Angehörige |  | Ausgangspunkt: Merkmal |  | Ergebnis: Klassifizierung |  |
|-----------------------------|--|-----------------------------|--|------------------------|--|---------------------------|--|
| <b>1. Zielsetzung</b>       |  |                             |  |                        |  |                           |  |
| <b>2. Identifizierung</b>   |  |                             |  |                        |  |                           |  |
| Ausgangspunkt               |  | Ergebnis                    |  | Ergebnis               |  | Ergebnis                  |  |
| Ausgangspunkt               |  | Ergebnis                    |  | Ergebnis               |  | Ergebnis                  |  |
| <b>3. Identifizierung</b>   |  |                             |  |                        |  |                           |  |
| <b>4. Identifizierung</b>   |  |                             |  |                        |  |                           |  |
| <b>5. Identifizierung</b>   |  |                             |  |                        |  |                           |  |
| <b>6. Identifizierung</b>   |  |                             |  |                        |  |                           |  |
| <b>7. Identifizierung</b>   |  |                             |  |                        |  |                           |  |
| <b>8. Identifizierung</b>   |  |                             |  |                        |  |                           |  |
| <b>9. Identifizierung</b>   |  |                             |  |                        |  |                           |  |
| <b>10. Identifizierung</b>  |  |                             |  |                        |  |                           |  |
| <b>11. Identifizierung</b>  |  |                             |  |                        |  |                           |  |
| <b>12. Identifizierung</b>  |  |                             |  |                        |  |                           |  |
| <b>13. Identifizierung</b>  |  |                             |  |                        |  |                           |  |
| <b>14. Identifizierung</b>  |  |                             |  |                        |  |                           |  |
| <b>15. Identifizierung</b>  |  |                             |  |                        |  |                           |  |
| <b>16. Identifizierung</b>  |  |                             |  |                        |  |                           |  |
| <b>17. Identifizierung</b>  |  |                             |  |                        |  |                           |  |
| <b>18. Identifizierung</b>  |  |                             |  |                        |  |                           |  |
| <b>19. Identifizierung</b>  |  |                             |  |                        |  |                           |  |
| <b>20. Identifizierung</b>  |  |                             |  |                        |  |                           |  |
| <b>21. Identifizierung</b>  |  |                             |  |                        |  |                           |  |
| <b>22. Identifizierung</b>  |  |                             |  |                        |  |                           |  |
| <b>23. Identifizierung</b>  |  |                             |  |                        |  |                           |  |
| <b>24. Identifizierung</b>  |  |                             |  |                        |  |                           |  |
| <b>25. Identifizierung</b>  |  |                             |  |                        |  |                           |  |
| <b>26. Identifizierung</b>  |  |                             |  |                        |  |                           |  |
| <b>27. Identifizierung</b>  |  |                             |  |                        |  |                           |  |
| <b>28. Identifizierung</b>  |  |                             |  |                        |  |                           |  |
| <b>29. Identifizierung</b>  |  |                             |  |                        |  |                           |  |
| <b>30. Identifizierung</b>  |  |                             |  |                        |  |                           |  |
| <b>31. Identifizierung</b>  |  |                             |  |                        |  |                           |  |
| <b>32. Identifizierung</b>  |  |                             |  |                        |  |                           |  |
| <b>33. Identifizierung</b>  |  |                             |  |                        |  |                           |  |
| <b>34. Identifizierung</b>  |  |                             |  |                        |  |                           |  |
| <b>35. Identifizierung</b>  |  |                             |  |                        |  |                           |  |
| <b>36. Identifizierung</b>  |  |                             |  |                        |  |                           |  |
| <b>37. Identifizierung</b>  |  |                             |  |                        |  |                           |  |
| <b>38. Identifizierung</b>  |  |                             |  |                        |  |                           |  |
| <b>39. Identifizierung</b>  |  |                             |  |                        |  |                           |  |
| <b>40. Identifizierung</b>  |  |                             |  |                        |  |                           |  |
| <b>41. Identifizierung</b>  |  |                             |  |                        |  |                           |  |
| <b>42. Identifizierung</b>  |  |                             |  |                        |  |                           |  |
| <b>43. Identifizierung</b>  |  |                             |  |                        |  |                           |  |
| <b>44. Identifizierung</b>  |  |                             |  |                        |  |                           |  |
| <b>45. Identifizierung</b>  |  |                             |  |                        |  |                           |  |
| <b>46. Identifizierung</b>  |  |                             |  |                        |  |                           |  |
| <b>47. Identifizierung</b>  |  |                             |  |                        |  |                           |  |
| <b>48. Identifizierung</b>  |  |                             |  |                        |  |                           |  |
| <b>49. Identifizierung</b>  |  |                             |  |                        |  |                           |  |
| <b>50. Identifizierung</b>  |  |                             |  |                        |  |                           |  |
| <b>51. Identifizierung</b>  |  |                             |  |                        |  |                           |  |
| <b>52. Identifizierung</b>  |  |                             |  |                        |  |                           |  |
| <b>53. Identifizierung</b>  |  |                             |  |                        |  |                           |  |
| <b>54. Identifizierung</b>  |  |                             |  |                        |  |                           |  |
| <b>55. Identifizierung</b>  |  |                             |  |                        |  |                           |  |
| <b>56. Identifizierung</b>  |  |                             |  |                        |  |                           |  |
| <b>57. Identifizierung</b>  |  |                             |  |                        |  |                           |  |
| <b>58. Identifizierung</b>  |  |                             |  |                        |  |                           |  |
| <b>59. Identifizierung</b>  |  |                             |  |                        |  |                           |  |
| <b>60. Identifizierung</b>  |  |                             |  |                        |  |                           |  |
| <b>61. Identifizierung</b>  |  |                             |  |                        |  |                           |  |
| <b>62. Identifizierung</b>  |  |                             |  |                        |  |                           |  |
| <b>63. Identifizierung</b>  |  |                             |  |                        |  |                           |  |
| <b>64. Identifizierung</b>  |  |                             |  |                        |  |                           |  |
| <b>65. Identifizierung</b>  |  |                             |  |                        |  |                           |  |
| <b>66. Identifizierung</b>  |  |                             |  |                        |  |                           |  |
| <b>67. Identifizierung</b>  |  |                             |  |                        |  |                           |  |
| <b>68. Identifizierung</b>  |  |                             |  |                        |  |                           |  |
| <b>69. Identifizierung</b>  |  |                             |  |                        |  |                           |  |
| <b>70. Identifizierung</b>  |  |                             |  |                        |  |                           |  |
| <b>71. Identifizierung</b>  |  |                             |  |                        |  |                           |  |
| <b>72. Identifizierung</b>  |  |                             |  |                        |  |                           |  |
| <b>73. Identifizierung</b>  |  |                             |  |                        |  |                           |  |
| <b>74. Identifizierung</b>  |  |                             |  |                        |  |                           |  |
| <b>75. Identifizierung</b>  |  |                             |  |                        |  |                           |  |
| <b>76. Identifizierung</b>  |  |                             |  |                        |  |                           |  |
| <b>77. Identifizierung</b>  |  |                             |  |                        |  |                           |  |
| <b>78. Identifizierung</b>  |  |                             |  |                        |  |                           |  |
| <b>79. Identifizierung</b>  |  |                             |  |                        |  |                           |  |
| <b>80. Identifizierung</b>  |  |                             |  |                        |  |                           |  |
| <b>81. Identifizierung</b>  |  |                             |  |                        |  |                           |  |
| <b>82. Identifizierung</b>  |  |                             |  |                        |  |                           |  |
| <b>83. Identifizierung</b>  |  |                             |  |                        |  |                           |  |
| <b>84. Identifizierung</b>  |  |                             |  |                        |  |                           |  |
| <b>85. Identifizierung</b>  |  |                             |  |                        |  |                           |  |
| <b>86. Identifizierung</b>  |  |                             |  |                        |  |                           |  |
| <b>87. Identifizierung</b>  |  |                             |  |                        |  |                           |  |
| <b>88. Identifizierung</b>  |  |                             |  |                        |  |                           |  |
| <b>89. Identifizierung</b>  |  |                             |  |                        |  |                           |  |
| <b>90. Identifizierung</b>  |  |                             |  |                        |  |                           |  |
| <b>91. Identifizierung</b>  |  |                             |  |                        |  |                           |  |
| <b>92. Identifizierung</b>  |  |                             |  |                        |  |                           |  |
| <b>93. Identifizierung</b>  |  |                             |  |                        |  |                           |  |
| <b>94. Identifizierung</b>  |  |                             |  |                        |  |                           |  |
| <b>95. Identifizierung</b>  |  |                             |  |                        |  |                           |  |
| <b>96. Identifizierung</b>  |  |                             |  |                        |  |                           |  |
| <b>97. Identifizierung</b>  |  |                             |  |                        |  |                           |  |
| <b>98. Identifizierung</b>  |  |                             |  |                        |  |                           |  |
| <b>99. Identifizierung</b>  |  |                             |  |                        |  |                           |  |
| <b>100. Identifizierung</b> |  |                             |  |                        |  |                           |  |

[illegible]

|                                          |                       |                      |                       |                      |
|------------------------------------------|-----------------------|----------------------|-----------------------|----------------------|
| <b>Abrechnung &amp; Reklamation</b>      | Abrechnungsgesamtheit | Reklamation          | Abrechnungsgesamtheit | Reklamation          |
| <b>2. Teilabteilung: Sachbearbeitung</b> |                       |                      |                       |                      |
| Rechnungsbearbeitung                     | Rechnungsbearbeitung  | Rechnungsbearbeitung | Rechnungsbearbeitung  | Rechnungsbearbeitung |
| <b>3. Teilabteilung: für den Kunden</b>  |                       |                      |                       |                      |
| Kunden                                   | Kundenbetreuung       | Kundenbetreuung      | Kundenbetreuung       | Kundenbetreuung      |
| <b>4. Teilabteilung: Verwaltung</b>      |                       |                      |                       |                      |
| Verwaltung                               | Verwaltung            | Verwaltung           | Verwaltung            | Verwaltung           |
| <b>5. Teilabteilung: Buchhaltung</b>     |                       |                      |                       |                      |
| Buchhaltung                              | Buchhaltung           | Buchhaltung          | Buchhaltung           | Buchhaltung          |
| <b>6. Teilabteilung: Beschaffung</b>     |                       |                      |                       |                      |
| Beschaffung                              | Beschaffung           | Beschaffung          | Beschaffung           | Beschaffung          |
| <b>7. Teilabteilung: Produktion</b>      |                       |                      |                       |                      |
| Produktion                               | Produktion            | Produktion           | Produktion            | Produktion           |
| <b>8. Teilabteilung: Vertrieb</b>        |                       |                      |                       |                      |
| Vertrieb                                 | Vertrieb              | Vertrieb             | Vertrieb              | Vertrieb             |
| <b>9. Teilabteilung: Marketing</b>       |                       |                      |                       |                      |
| Marketing                                | Marketing             | Marketing            | Marketing             | Marketing            |
| <b>10. Teilabteilung: Personal</b>       |                       |                      |                       |                      |
| Personal                                 | Personal              | Personal             | Personal              | Personal             |
| <b>11. Teilabteilung: IT</b>             |                       |                      |                       |                      |
| IT                                       | IT                    | IT                   | IT                    | IT                   |
| <b>12. Teilabteilung: Recht</b>          |                       |                      |                       |                      |
| Recht                                    | Recht                 | Recht                | Recht                 | Recht                |
| <b>13. Teilabteilung: Sonstige</b>       |                       |                      |                       |                      |
| Sonstige                                 | Sonstige              | Sonstige             | Sonstige              | Sonstige             |

|                                                    |  |
|----------------------------------------------------|--|
| <b>Metzsch + Rohrer</b><br><b>-&gt; Tefalco AG</b> |  |
| <b>1. Geschäftsleitung</b>                         |  |
| Geschäftsführer:                                   |  |
| Geschäftsführer:                                   |  |
| <b>2. Unternehmensparameter für das J. 2017</b>    |  |
| Umsatz:                                            |  |
| <b>3. Kalkulationsparameter</b>                    |  |
| Kalkulationskoeffizient:                           |  |
| Kalkulationskoeffizient:                           |  |

[illegible]

| Marken- & Submarken                         |  | Anzahl eingetragene Marken |        | Anzahl eingetragene Submarken |           |
|---------------------------------------------|--|----------------------------|--------|-------------------------------|-----------|
| 3.7.1 Marken & Submarken                    |  |                            |        |                               |           |
| 1. Markenübersicht                          |  | Anzahl eingetragene Marken |        | Anzahl eingetragene Submarken |           |
| Markenname                                  |  | Einzelmarken               | Marken | Marken                        | Submarken |
| 2. Markenübersicht für die Markenübersicht  |  | Anzahl eingetragene Marken |        | Anzahl eingetragene Submarken |           |
| Marken                                      |  | Einzelmarken               | Marken | Marken                        | Submarken |
| 3.7.2 Marken & Submarken                    |  |                            |        |                               |           |
| 3. Markenübersicht                          |  | Anzahl eingetragene Marken |        | Anzahl eingetragene Submarken |           |
| Markenname                                  |  | Einzelmarken               | Marken | Marken                        | Submarken |
| 4. Markenübersicht für die Markenübersicht  |  | Anzahl eingetragene Marken |        | Anzahl eingetragene Submarken |           |
| Marken                                      |  | Einzelmarken               | Marken | Marken                        | Submarken |
| 3.7.3 Marken & Submarken                    |  |                            |        |                               |           |
| 5. Markenübersicht                          |  | Anzahl eingetragene Marken |        | Anzahl eingetragene Submarken |           |
| Markenname                                  |  | Einzelmarken               | Marken | Marken                        | Submarken |
| 6. Markenübersicht für die Markenübersicht  |  | Anzahl eingetragene Marken |        | Anzahl eingetragene Submarken |           |
| Marken                                      |  | Einzelmarken               | Marken | Marken                        | Submarken |
| 3.7.4 Marken & Submarken                    |  |                            |        |                               |           |
| 7. Markenübersicht                          |  | Anzahl eingetragene Marken |        | Anzahl eingetragene Submarken |           |
| Markenname                                  |  | Einzelmarken               | Marken | Marken                        | Submarken |
| 8. Markenübersicht für die Markenübersicht  |  | Anzahl eingetragene Marken |        | Anzahl eingetragene Submarken |           |
| Marken                                      |  | Einzelmarken               | Marken | Marken                        | Submarken |
| 3.7.5 Marken & Submarken                    |  |                            |        |                               |           |
| 9. Markenübersicht                          |  | Anzahl eingetragene Marken |        | Anzahl eingetragene Submarken |           |
| Markenname                                  |  | Einzelmarken               | Marken | Marken                        | Submarken |
| 10. Markenübersicht für die Markenübersicht |  | Anzahl eingetragene Marken |        | Anzahl eingetragene Submarken |           |
| Marken                                      |  | Einzelmarken               | Marken | Marken                        | Submarken |

[illegible][illegible][illegible][illegible]

|                                  |                                                                              |                                          |                                      |
|----------------------------------|------------------------------------------------------------------------------|------------------------------------------|--------------------------------------|
| <b>Abschnitt 3: Bachelor</b>     | Welche Hauptkomponenten des Unternehmens sind für den Erfolg verantwortlich? | Welche Aufgaben haben diese Komponenten? | Welche Ressourcen sind erforderlich? |
| <b>3.1 Produktentwicklung</b>    | <b>Produktentwicklung</b>                                                    | <b>Produktentwicklung</b>                | <b>Produktentwicklung</b>            |
| <b>3.2 Produktion</b>            | <b>Produktion</b>                                                            | <b>Produktion</b>                        | <b>Produktion</b>                    |
| <b>3.3 Distribution</b>          | <b>Distribution</b>                                                          | <b>Distribution</b>                      | <b>Distribution</b>                  |
| <b>3.4 Marketing</b>             | <b>Marketing</b>                                                             | <b>Marketing</b>                         | <b>Marketing</b>                     |
| <b>3.5 Personalmanagement</b>    | <b>Personalmanagement</b>                                                    | <b>Personalmanagement</b>                | <b>Personalmanagement</b>            |
| <b>3.6 Beschaffung</b>           | <b>Beschaffung</b>                                                           | <b>Beschaffung</b>                       | <b>Beschaffung</b>                   |
| <b>3.7 Finanzierung</b>          | <b>Finanzierung</b>                                                          | <b>Finanzierung</b>                      | <b>Finanzierung</b>                  |
| <b>3.8 Controlling</b>           | <b>Controlling</b>                                                           | <b>Controlling</b>                       | <b>Controlling</b>                   |
| <b>3.9 Recht</b>                 | <b>Recht</b>                                                                 | <b>Recht</b>                             | <b>Recht</b>                         |
| <b>3.10 Steuern</b>              | <b>Steuern</b>                                                               | <b>Steuern</b>                           | <b>Steuern</b>                       |
| <b>3.11 Umwelt</b>               | <b>Umwelt</b>                                                                | <b>Umwelt</b>                            | <b>Umwelt</b>                        |
| <b>3.12 Sonstiges</b>            | <b>Sonstiges</b>                                                             | <b>Sonstiges</b>                         | <b>Sonstiges</b>                     |
| <b>3.13 Zusammenfassung</b>      | <b>Zusammenfassung</b>                                                       | <b>Zusammenfassung</b>                   | <b>Zusammenfassung</b>               |
| <b>3.14 Literaturverzeichnis</b> | <b>Literaturverzeichnis</b>                                                  | <b>Literaturverzeichnis</b>              | <b>Literaturverzeichnis</b>          |
| <b>3.15 Anhang</b>               | <b>Anhang</b>                                                                | <b>Anhang</b>                            | <b>Anhang</b>                        |
| <b>3.16 Index</b>                | <b>Index</b>                                                                 | <b>Index</b>                             | <b>Index</b>                         |
| <b>3.17 Glossar</b>              | <b>Glossar</b>                                                               | <b>Glossar</b>                           | <b>Glossar</b>                       |
| <b>3.18 Zusammenfassung</b>      | <b>Zusammenfassung</b>                                                       | <b>Zusammenfassung</b>                   | <b>Zusammenfassung</b>               |
| <b>3.19 Literaturverzeichnis</b> | <b>Literaturverzeichnis</b>                                                  | <b>Literaturverzeichnis</b>              | <b>Literaturverzeichnis</b>          |
| <b>3.20 Anhang</b>               | <b>Anhang</b>                                                                | <b>Anhang</b>                            | <b>Anhang</b>                        |
| <b>3.21 Index</b>                | <b>Index</b>                                                                 | <b>Index</b>                             | <b>Index</b>                         |
| <b>3.22 Glossar</b>              | <b>Glossar</b>                                                               | <b>Glossar</b>                           | <b>Glossar</b>                       |
| <b>3.23 Zusammenfassung</b>      | <b>Zusammenfassung</b>                                                       | <b>Zusammenfassung</b>                   | <b>Zusammenfassung</b>               |
| <b>3.24 Literaturverzeichnis</b> | <b>Literaturverzeichnis</b>                                                  | <b>Literaturverzeichnis</b>              | <b>Literaturverzeichnis</b>          |
| <b>3.25 Anhang</b>               | <b>Anhang</b>                                                                | <b>Anhang</b>                            | <b>Anhang</b>                        |
| <b>3.26 Index</b>                | <b>Index</b>                                                                 | <b>Index</b>                             | <b>Index</b>                         |
| <b>3.27 Glossar</b>              | <b>Glossar</b>                                                               | <b>Glossar</b>                           | <b>Glossar</b>                       |
| <b>3.28 Zusammenfassung</b>      | <b>Zusammenfassung</b>                                                       | <b>Zusammenfassung</b>                   | <b>Zusammenfassung</b>               |
| <b>3.29 Literaturverzeichnis</b> | <b>Literaturverzeichnis</b>                                                  | <b>Literaturverzeichnis</b>              | <b>Literaturverzeichnis</b>          |
| <b>3.30 Anhang</b>               | <b>Anhang</b>                                                                | <b>Anhang</b>                            | <b>Anhang</b>                        |
| <b>3.31 Index</b>                | <b>Index</b>                                                                 | <b>Index</b>                             | <b>Index</b>                         |
| <b>3.32 Glossar</b>              | <b>Glossar</b>                                                               | <b>Glossar</b>                           | <b>Glossar</b>                       |
| <b>3.33 Zusammenfassung</b>      | <b>Zusammenfassung</b>                                                       | <b>Zusammenfassung</b>                   | <b>Zusammenfassung</b>               |
| <b>3.34 Literaturverzeichnis</b> | <b>Literaturverzeichnis</b>                                                  | <b>Literaturverzeichnis</b>              | <b>Literaturverzeichnis</b>          |
| <b>3.35 Anhang</b>               | <b>Anhang</b>                                                                | <b>Anhang</b>                            | <b>Anhang</b>                        |
| <b>3.36 Index</b>                | <b>Index</b>                                                                 | <b>Index</b>                             | <b>Index</b>                         |
| <b>3.37 Glossar</b>              | <b>Glossar</b>                                                               | <b>Glossar</b>                           | <b>Glossar</b>                       |
| <b>3.38 Zusammenfassung</b>      | <b>Zusammenfassung</b>                                                       | <b>Zusammenfassung</b>                   | <b>Zusammenfassung</b>               |
| <b>3.39 Literaturverzeichnis</b> | <b>Literaturverzeichnis</b>                                                  | <b>Literaturverzeichnis</b>              | <b>Literaturverzeichnis</b>          |
| <b>3.40 Anhang</b>               | <b>Anhang</b>                                                                | <b>Anhang</b>                            | <b>Anhang</b>                        |
| <b>3.41 Index</b>                | <b>Index</b>                                                                 | <b>Index</b>                             | <b>Index</b>                         |
| <b>3.42 Glossar</b>              | <b>Glossar</b>                                                               | <b>Glossar</b>                           | <b>Glossar</b>                       |
| <b>3.43 Zusammenfassung</b>      | <b>Zusammenfassung</b>                                                       | <b>Zusammenfassung</b>                   | <b>Zusammenfassung</b>               |
| <b>3.44 Literaturverzeichnis</b> | <b>Literaturverzeichnis</b>                                                  | <b>Literaturverzeichnis</b>              | <b>Literaturverzeichnis</b>          |
| <b>3.45 Anhang</b>               | <b>Anhang</b>                                                                | <b>Anhang</b>                            | <b>Anhang</b>                        |
| <b>3.46 Index</b>                | <b>Index</b>                                                                 | <b>Index</b>                             | <b>Index</b>                         |
| <b>3.47 Glossar</b>              | <b>Glossar</b>                                                               | <b>Glossar</b>                           | <b>Glossar</b>                       |
| <b>3.48 Zusammenfassung</b>      | <b>Zusammenfassung</b>                                                       | <b>Zusammenfassung</b>                   | <b>Zusammenfassung</b>               |
| <b>3.49 Literaturverzeichnis</b> | <b>Literaturverzeichnis</b>                                                  | <b>Literaturverzeichnis</b>              | <b>Literaturverzeichnis</b>          |
| <b>3.50 Anhang</b>               | <b>Anhang</b>                                                                | <b>Anhang</b>                            | <b>Anhang</b>                        |
| <b>3.51 Index</b>                | <b>Index</b>                                                                 | <b>Index</b>                             | <b>Index</b>                         |
| <b>3.52 Glossar</b>              | <b>Glossar</b>                                                               | <b>Glossar</b>                           | <b>Glossar</b>                       |
| <b>3.53 Zusammenfassung</b>      | <b>Zusammenfassung</b>                                                       | <b>Zusammenfassung</b>                   | <b>Zusammenfassung</b>               |
| <b>3.54 Literaturverzeichnis</b> | <b>Literaturverzeichnis</b>                                                  | <b>Literaturverzeichnis</b>              | <b>Literaturverzeichnis</b>          |
| <b>3.55 Anhang</b>               | <b>Anhang</b>                                                                | <b>Anhang</b>                            | <b>Anhang</b>                        |
| <b>3.56 Index</b>                | <b>Index</b>                                                                 | <b>Index</b>                             | <b>Index</b>                         |
| <b>3.57 Glossar</b>              | <b>Glossar</b>                                                               | <b>Glossar</b>                           | <b>Glossar</b>                       |
| <b>3.58 Zusammenfassung</b>      | <b>Zusammenfassung</b>                                                       | <b>Zusammenfassung</b>                   | <b>Zusammenfassung</b>               |
| <b>3.59 Literaturverzeichnis</b> | <b>Literaturverzeichnis</b>                                                  | <b>Literaturverzeichnis</b>              | <b>Literaturverzeichnis</b>          |
| <b>3.60 Anhang</b>               | <b>Anhang</b>                                                                | <b>Anhang</b>                            | <b>Anhang</b>                        |
| <b>3.61 Index</b>                | <b>Index</b>                                                                 | <b>Index</b>                             | <b>Index</b>                         |
| <b>3.62 Glossar</b>              | <b>Glossar</b>                                                               | <b>Glossar</b>                           | <b>Glossar</b>                       |
| <b>3.63 Zusammenfassung</b>      | <b>Zusammenfassung</b>                                                       | <b>Zusammenfassung</b>                   | <b>Zusammenfassung</b>               |
| <b>3.64 Literaturverzeichnis</b> | <b>Literaturverzeichnis</b>                                                  | <b>Literaturverzeichnis</b>              | <b>Literaturverzeichnis</b>          |
| <b>3.65 Anhang</b>               | <b>Anhang</b>                                                                | <b>Anhang</b>                            | <b>Anhang</b>                        |
| <b>3.66 Index</b>                | <b>Index</b>                                                                 | <b>Index</b>                             | <b>Index</b>                         |
| <b>3.67 Glossar</b>              | <b>Glossar</b>                                                               | <b>Glossar</b>                           | <b>Glossar</b>                       |
| <b>3.68 Zusammenfassung</b>      | <b>Zusammenfassung</b>                                                       | <b>Zusammenfassung</b>                   | <b>Zusammenfassung</b>               |
| <b>3.69 Literaturverzeichnis</b> | <b>Literaturverzeichnis</b>                                                  | <b>Literaturverzeichnis</b>              | <b>Literaturverzeichnis</b>          |
| <b>3.70 Anhang</b>               | <b>Anhang</b>                                                                | <b>Anhang</b>                            | <b>Anhang</b>                        |
| <b>3.71 Index</b>                | <b>Index</b>                                                                 | <b>Index</b>                             | <b>Index</b>                         |
| <b>3.72 Glossar</b>              | <b>Glossar</b>                                                               | <b>Glossar</b>                           | <b>Glossar</b>                       |
| <b>3.73 Zusammenfassung</b>      | <b>Zusammenfassung</b>                                                       | <b>Zusammenfassung</b>                   | <b>Zusammenfassung</b>               |
| <b>3.74 Literaturverzeichnis</b> | <b>Literaturverzeichnis</b>                                                  | <b>Literaturverzeichnis</b>              | <b>Literaturverzeichnis</b>          |
| <b>3.75 Anhang</b>               | <b>Anhang</b>                                                                | <b>Anhang</b>                            | <b>Anhang</b> </                     |

|                                                                                                      |
|------------------------------------------------------------------------------------------------------|
| <p>→ Zweifelsfreie Schlussfolgerungen</p> <p>Schlussschema</p> <p>Bedingung und Schlussfolgerung</p> |
|------------------------------------------------------------------------------------------------------|

  

|                                                                                                                                                                                                                                                      |
|------------------------------------------------------------------------------------------------------------------------------------------------------------------------------------------------------------------------------------------------------|
| <p><b>Monoch + Rekursor</b></p> <p>→ Teilweise</p> <p>1. Schlussfolgerung</p> <p>Rekursive Beding.</p> <p>→ Rekursionsparameter für Monoch</p> <p>Monoch</p> <p>→ Rekursionsparameter</p> <p>Rekursiver Monoch-Rekursor</p> <p>Aktion und Monoch</p> |
|------------------------------------------------------------------------------------------------------------------------------------------------------------------------------------------------------------------------------------------------------|

[illegible][illegible][illegible]

|                                                                                                                                                                                                                                                                                                                                                              |
|--------------------------------------------------------------------------------------------------------------------------------------------------------------------------------------------------------------------------------------------------------------------------------------------------------------------------------------------------------------|
| <p><b>Messung + Kalibrier</b></p> <p>→ Teilzahl 23</p> <p>• Kalibrierungsfaktor</p> <p>Kalibrierungsfaktor</p> <p>• Kalibrierungsparameter für Messung</p> <p>Messwert</p> <p>• Kalibrierungsparameter</p> <p>Spezifischer Messwert</p> <p>Messwert und -standard</p> <p>Kalibrierungsfaktor</p> <p>• Zusätzliche Kalibrierungsparameter</p> <p>Messwert</p> |
|--------------------------------------------------------------------------------------------------------------------------------------------------------------------------------------------------------------------------------------------------------------------------------------------------------------------------------------------------------------|

10. *Journal of the American Medical Association*, 2000; 284: 2689-2695.
