# Supplementary material
Source: MDPI journal article supplement (https://www.mdpi.com/2076-3417/12/11/5639)
Supplement: s1 [file s1]

| Aufgaben |    |                |    | Name/Vorname/Nummer |    | Kursnummer |    | Klausurnummer |     |
|----------|----|----------------|----|---------------------|----|------------|----|---------------|-----|
| Student  |    | Matrikelnummer |    | Vorname             |    | Nachname   |    | Klausurnummer |     |
| ID       |    | ID             |    | ID                  |    | ID         |    | ID            |     |
| 1        | 2  | 3              | 4  | 5                   | 6  | 7          | 8  | 9             | 10  |
| 11       | 12 | 13             | 14 | 15                  | 16 | 17         | 18 | 19            | 20  |
| 21       | 22 | 23             | 24 | 25                  | 26 | 27         | 28 | 29            | 30  |
| 31       | 32 | 33             | 34 | 35                  | 36 | 37         | 38 | 39            | 40  |
| 41       | 42 | 43             | 44 | 45                  | 46 | 47         | 48 | 49            | 50  |
| 51       | 52 | 53             | 54 | 55                  | 56 | 57         | 58 | 59            | 60  |
| 61       | 62 | 63             | 64 | 65                  | 66 | 67         | 68 | 69            | 70  |
| 71       | 72 | 73             | 74 | 75                  | 76 | 77         | 78 | 79            | 80  |
| 81       | 82 | 83             | 84 | 85                  | 86 | 87         | 88 | 89            | 90  |
| 91       | 92 | 93             | 94 | 95                  | 96 | 97         | 98 | 99            | 100 |

[illegible]

| Name                                                                                                                                                                                                                                                                                                                                                |  | Date |  | Page |  |
|-----------------------------------------------------------------------------------------------------------------------------------------------------------------------------------------------------------------------------------------------------------------------------------------------------------------------------------------------------|--|------|--|------|--|
| No.                                                                                                                                                                                                                                                                                                                                                 |  | Date |  | Page |  |
| <b>1. Identification</b><br>a. Name of the organization<br>b. Address<br>c. City<br>d. State<br>e. Zip<br>f. Country<br>g. Telephone<br>h. Fax<br>i. E-mail<br>j. Website<br>k. Other                                                                                                                                                               |  |      |  |      |  |
| <b>2. Description of the organization</b><br>a. Nature of the organization<br>b. Mission<br>c. Vision<br>d. Values<br>e. Goals<br>f. Objectives<br>g. Programs<br>h. Services<br>i. Products<br>j. Other                                                                                                                                            |  |      |  |      |  |
| <b>3. Financial information</b><br>a. Budget<br>b. Income<br>c. Expenses<br>d. Assets<br>e. Liabilities<br>f. Net worth<br>g. Other                                                                                                                                                                                                                 |  |      |  |      |  |
| <b>4. Management information</b><br>a. Board of directors<br>b. Officers<br>c. Staff<br>d. Volunteers<br>e. Other                                                                                                                                                                                                                                   |  |      |  |      |  |
| <b>5. Other information</b><br>a. Other<br>b. Other<br>c. Other<br>d. Other<br>e. Other<br>f. Other<br>g. Other<br>h. Other<br>i. Other<br>j. Other<br>k. Other<br>l. Other<br>m. Other<br>n. Other<br>o. Other<br>p. Other<br>q. Other<br>r. Other<br>s. Other<br>t. Other<br>u. Other<br>v. Other<br>w. Other<br>x. Other<br>y. Other<br>z. Other |  |      |  |      |  |

[illegible][illegible]

Declaration of interest: None.

Downloaded from ascelibrary.org by University of California, San Diego on 06/01/15. Copyright ASCE, For All Rights Reserved, No part of this document may be reproduced without written permission from ASCE.

Copyright © 2010 Wolters Kluwer Health | Lippincott Williams & Wilkins

William H. Ransford

| Metapher + Reduktion        |  | Grundgesamtheit: Angehörige |  | Ausgangspunkt: Merkmal |  | Ergebnis: Klassifizierung |  |
|-----------------------------|--|-----------------------------|--|------------------------|--|---------------------------|--|
| <b>1. Zielsetzung</b>       |  |                             |  |                        |  |                           |  |
| <b>2. Identifizierung</b>   |  |                             |  |                        |  |                           |  |
| Ausgangspunkt               |  | Ergebnis: Merkmal           |  | Ergebnis: Merkmal      |  | Ergebnis: Merkmal         |  |
| <b>3. Identifizierung</b>   |  |                             |  |                        |  |                           |  |
| <b>4. Identifizierung</b>   |  |                             |  |                        |  |                           |  |
| <b>5. Identifizierung</b>   |  |                             |  |                        |  |                           |  |
| <b>6. Identifizierung</b>   |  |                             |  |                        |  |                           |  |
| <b>7. Identifizierung</b>   |  |                             |  |                        |  |                           |  |
| <b>8. Identifizierung</b>   |  |                             |  |                        |  |                           |  |
| <b>9. Identifizierung</b>   |  |                             |  |                        |  |                           |  |
| <b>10. Identifizierung</b>  |  |                             |  |                        |  |                           |  |
| <b>11. Identifizierung</b>  |  |                             |  |                        |  |                           |  |
| <b>12. Identifizierung</b>  |  |                             |  |                        |  |                           |  |
| <b>13. Identifizierung</b>  |  |                             |  |                        |  |                           |  |
| <b>14. Identifizierung</b>  |  |                             |  |                        |  |                           |  |
| <b>15. Identifizierung</b>  |  |                             |  |                        |  |                           |  |
| <b>16. Identifizierung</b>  |  |                             |  |                        |  |                           |  |
| <b>17. Identifizierung</b>  |  |                             |  |                        |  |                           |  |
| <b>18. Identifizierung</b>  |  |                             |  |                        |  |                           |  |
| <b>19. Identifizierung</b>  |  |                             |  |                        |  |                           |  |
| <b>20. Identifizierung</b>  |  |                             |  |                        |  |                           |  |
| <b>21. Identifizierung</b>  |  |                             |  |                        |  |                           |  |
| <b>22. Identifizierung</b>  |  |                             |  |                        |  |                           |  |
| <b>23. Identifizierung</b>  |  |                             |  |                        |  |                           |  |
| <b>24. Identifizierung</b>  |  |                             |  |                        |  |                           |  |
| <b>25. Identifizierung</b>  |  |                             |  |                        |  |                           |  |
| <b>26. Identifizierung</b>  |  |                             |  |                        |  |                           |  |
| <b>27. Identifizierung</b>  |  |                             |  |                        |  |                           |  |
| <b>28. Identifizierung</b>  |  |                             |  |                        |  |                           |  |
| <b>29. Identifizierung</b>  |  |                             |  |                        |  |                           |  |
| <b>30. Identifizierung</b>  |  |                             |  |                        |  |                           |  |
| <b>31. Identifizierung</b>  |  |                             |  |                        |  |                           |  |
| <b>32. Identifizierung</b>  |  |                             |  |                        |  |                           |  |
| <b>33. Identifizierung</b>  |  |                             |  |                        |  |                           |  |
| <b>34. Identifizierung</b>  |  |                             |  |                        |  |                           |  |
| <b>35. Identifizierung</b>  |  |                             |  |                        |  |                           |  |
| <b>36. Identifizierung</b>  |  |                             |  |                        |  |                           |  |
| <b>37. Identifizierung</b>  |  |                             |  |                        |  |                           |  |
| <b>38. Identifizierung</b>  |  |                             |  |                        |  |                           |  |
| <b>39. Identifizierung</b>  |  |                             |  |                        |  |                           |  |
| <b>40. Identifizierung</b>  |  |                             |  |                        |  |                           |  |
| <b>41. Identifizierung</b>  |  |                             |  |                        |  |                           |  |
| <b>42. Identifizierung</b>  |  |                             |  |                        |  |                           |  |
| <b>43. Identifizierung</b>  |  |                             |  |                        |  |                           |  |
| <b>44. Identifizierung</b>  |  |                             |  |                        |  |                           |  |
| <b>45. Identifizierung</b>  |  |                             |  |                        |  |                           |  |
| <b>46. Identifizierung</b>  |  |                             |  |                        |  |                           |  |
| <b>47. Identifizierung</b>  |  |                             |  |                        |  |                           |  |
| <b>48. Identifizierung</b>  |  |                             |  |                        |  |                           |  |
| <b>49. Identifizierung</b>  |  |                             |  |                        |  |                           |  |
| <b>50. Identifizierung</b>  |  |                             |  |                        |  |                           |  |
| <b>51. Identifizierung</b>  |  |                             |  |                        |  |                           |  |
| <b>52. Identifizierung</b>  |  |                             |  |                        |  |                           |  |
| <b>53. Identifizierung</b>  |  |                             |  |                        |  |                           |  |
| <b>54. Identifizierung</b>  |  |                             |  |                        |  |                           |  |
| <b>55. Identifizierung</b>  |  |                             |  |                        |  |                           |  |
| <b>56. Identifizierung</b>  |  |                             |  |                        |  |                           |  |
| <b>57. Identifizierung</b>  |  |                             |  |                        |  |                           |  |
| <b>58. Identifizierung</b>  |  |                             |  |                        |  |                           |  |
| <b>59. Identifizierung</b>  |  |                             |  |                        |  |                           |  |
| <b>60. Identifizierung</b>  |  |                             |  |                        |  |                           |  |
| <b>61. Identifizierung</b>  |  |                             |  |                        |  |                           |  |
| <b>62. Identifizierung</b>  |  |                             |  |                        |  |                           |  |
| <b>63. Identifizierung</b>  |  |                             |  |                        |  |                           |  |
| <b>64. Identifizierung</b>  |  |                             |  |                        |  |                           |  |
| <b>65. Identifizierung</b>  |  |                             |  |                        |  |                           |  |
| <b>66. Identifizierung</b>  |  |                             |  |                        |  |                           |  |
| <b>67. Identifizierung</b>  |  |                             |  |                        |  |                           |  |
| <b>68. Identifizierung</b>  |  |                             |  |                        |  |                           |  |
| <b>69. Identifizierung</b>  |  |                             |  |                        |  |                           |  |
| <b>70. Identifizierung</b>  |  |                             |  |                        |  |                           |  |
| <b>71. Identifizierung</b>  |  |                             |  |                        |  |                           |  |
| <b>72. Identifizierung</b>  |  |                             |  |                        |  |                           |  |
| <b>73. Identifizierung</b>  |  |                             |  |                        |  |                           |  |
| <b>74. Identifizierung</b>  |  |                             |  |                        |  |                           |  |
| <b>75. Identifizierung</b>  |  |                             |  |                        |  |                           |  |
| <b>76. Identifizierung</b>  |  |                             |  |                        |  |                           |  |
| <b>77. Identifizierung</b>  |  |                             |  |                        |  |                           |  |
| <b>78. Identifizierung</b>  |  |                             |  |                        |  |                           |  |
| <b>79. Identifizierung</b>  |  |                             |  |                        |  |                           |  |
| <b>80. Identifizierung</b>  |  |                             |  |                        |  |                           |  |
| <b>81. Identifizierung</b>  |  |                             |  |                        |  |                           |  |
| <b>82. Identifizierung</b>  |  |                             |  |                        |  |                           |  |
| <b>83. Identifizierung</b>  |  |                             |  |                        |  |                           |  |
| <b>84. Identifizierung</b>  |  |                             |  |                        |  |                           |  |
| <b>85. Identifizierung</b>  |  |                             |  |                        |  |                           |  |
| <b>86. Identifizierung</b>  |  |                             |  |                        |  |                           |  |
| <b>87. Identifizierung</b>  |  |                             |  |                        |  |                           |  |
| <b>88. Identifizierung</b>  |  |                             |  |                        |  |                           |  |
| <b>89. Identifizierung</b>  |  |                             |  |                        |  |                           |  |
| <b>90. Identifizierung</b>  |  |                             |  |                        |  |                           |  |
| <b>91. Identifizierung</b>  |  |                             |  |                        |  |                           |  |
| <b>92. Identifizierung</b>  |  |                             |  |                        |  |                           |  |
| <b>93. Identifizierung</b>  |  |                             |  |                        |  |                           |  |
| <b>94. Identifizierung</b>  |  |                             |  |                        |  |                           |  |
| <b>95. Identifizierung</b>  |  |                             |  |                        |  |                           |  |
| <b>96. Identifizierung</b>  |  |                             |  |                        |  |                           |  |
| <b>97. Identifizierung</b>  |  |                             |  |                        |  |                           |  |
| <b>98. Identifizierung</b>  |  |                             |  |                        |  |                           |  |
| <b>99. Identifizierung</b>  |  |                             |  |                        |  |                           |  |
| <b>100. Identifizierung</b> |  |                             |  |                        |  |                           |  |

[illegible][illegible]

|                                                    |  |
|----------------------------------------------------|--|
| <b>Metzsch + Rohrer</b><br><b>-&gt; Tefalco AG</b> |  |
| <b>1. Geschäftsleitung</b>                         |  |
| <b>Adolfsson, Stefan</b>                           |  |
| <b>2. Geschäftsparameter für das 1. Jahr</b>       |  |
| <b>Waren</b>                                       |  |
| <b>3. Geschäftsparameter</b>                       |  |
| <b>Arbeits- und Wartezeiten</b>                    |  |
| <b>4. Geschäftsparameter für das 2. Jahr</b>       |  |
| <b>Arbeits- und Wartezeiten</b>                    |  |

[illegible]

| Marken- & Submarken                         |  | Anzahl eingetragene Marken |        | Anzahl eingetragene Submarken |           |
|---------------------------------------------|--|----------------------------|--------|-------------------------------|-----------|
| 3.7.1 Marken & Submarken                    |  |                            |        |                               |           |
| 1. Markenübersicht                          |  | Anzahl eingetragene Marken |        | Anzahl eingetragene Submarken |           |
| Markenname                                  |  | Einzelmarken               | Marken | Marken                        | Submarken |
| 2. Markenübersicht für die Markenübersicht  |  | Anzahl eingetragene Marken |        | Anzahl eingetragene Submarken |           |
| Marken                                      |  | Einzelmarken               | Marken | Marken                        | Submarken |
| 3.7.2 Marken & Submarken                    |  |                            |        |                               |           |
| 3. Markenübersicht                          |  | Anzahl eingetragene Marken |        | Anzahl eingetragene Submarken |           |
| Markenname                                  |  | Einzelmarken               | Marken | Marken                        | Submarken |
| 4. Markenübersicht für die Markenübersicht  |  | Anzahl eingetragene Marken |        | Anzahl eingetragene Submarken |           |
| Marken                                      |  | Einzelmarken               | Marken | Marken                        | Submarken |
| 3.7.3 Marken & Submarken                    |  |                            |        |                               |           |
| 5. Markenübersicht                          |  | Anzahl eingetragene Marken |        | Anzahl eingetragene Submarken |           |
| Markenname                                  |  | Einzelmarken               | Marken | Marken                        | Submarken |
| 6. Markenübersicht für die Markenübersicht  |  | Anzahl eingetragene Marken |        | Anzahl eingetragene Submarken |           |
| Marken                                      |  | Einzelmarken               | Marken | Marken                        | Submarken |
| 3.7.4 Marken & Submarken                    |  |                            |        |                               |           |
| 7. Markenübersicht                          |  | Anzahl eingetragene Marken |        | Anzahl eingetragene Submarken |           |
| Markenname                                  |  | Einzelmarken               | Marken | Marken                        | Submarken |
| 8. Markenübersicht für die Markenübersicht  |  | Anzahl eingetragene Marken |        | Anzahl eingetragene Submarken |           |
| Marken                                      |  | Einzelmarken               | Marken | Marken                        | Submarken |
| 3.7.5 Marken & Submarken                    |  |                            |        |                               |           |
| 9. Markenübersicht                          |  | Anzahl eingetragene Marken |        | Anzahl eingetragene Submarken |           |
| Markenname                                  |  | Einzelmarken               | Marken | Marken                        | Submarken |
| 10. Markenübersicht für die Markenübersicht |  | Anzahl eingetragene Marken |        | Anzahl eingetragene Submarken |           |
| Marken                                      |  | Einzelmarken               | Marken | Marken                        | Submarken |

[illegible][illegible][illegible][illegible][illegible][illegible][illegible][illegible][illegible]

|                                                                                                                                                                                                                                                                                                                                                                                                                                     |
|-------------------------------------------------------------------------------------------------------------------------------------------------------------------------------------------------------------------------------------------------------------------------------------------------------------------------------------------------------------------------------------------------------------------------------------|
| <p><b>Messung + Kalibrier</b></p> <p>→ Teilzahl 23</p> <p>• Schallwellenlänge</p> <p>Schallgeschwindigkeit</p> <p>• Frequenzparameter für akustische</p> <p>Wellen</p> <p>• Frequenzparameter</p> <p>Spezifische Schwingungszahl</p> <p>Änderung der Wellenlänge</p> <p>Änderung der Wellenlänge</p> <p>Wellenlänge der gestrahlten Schallwellen</p> <p>Wellenlänge</p> <p>• Zusätzliche Schwingungszahl</p> <p>Schwingungszahl</p> |
|-------------------------------------------------------------------------------------------------------------------------------------------------------------------------------------------------------------------------------------------------------------------------------------------------------------------------------------------------------------------------------------------------------------------------------------|

10. *Journal of the American Medical Association*, 2000; 283: 2689-2696.
